# Supplementary material
Source: PubMed Central journal article supplement (PMC3734783)

## DESCRIPTION

Modified LabDiet® RMH 3000 Diet, 5P00, with 0.0625% (625 ppm) Doxycycline.

**CAUTION:** Contains a drug or compound for investigational use only in laboratory research animals or for tests in vitro. Not for use in humans.

Storage conditions are particularly critical to TestDiet® products, due to the absence of antioxidants or preservative agents. To provide maximum protection against possible changes during storage, store in a dry, cool location. Storage under refrigeration (2° C) is recommended. Maximum shelf life is six months. (If long term studies are involved, storing the diet at -20° C or colder may prolong shelf life.) Be certain to keep in air tight containers.

### Product Forms Available\* Catalog #

1/2" Pellet, Irradiated 1814157

\*Other Forms Available On Request

### INGREDIENTS (%)

ProLab RMH 3000 99.9375  
Doxycycline 0.0625

## FEEDING DIRECTIONS

Feed ad libitum. Plenty of fresh, clean water should be available at all times.

### CAUTION:

**Perishable - store properly upon receipt. For laboratory animal use only; not for human consumption.**

12/12/2010

## NUTRITIONAL PROFILE <sup>1</sup>

|                                                 |             |                               |            |
|-------------------------------------------------|-------------|-------------------------------|------------|
| <b>Protein, %</b>                               | <b>22.5</b> | <b>Minerals</b>               |            |
| Arginine, %                                     | 1.35        | <b>Ash, %</b>                 | <b>6.3</b> |
| Histidine, %                                    | 0.53        | Calcium, %                    | 1.06       |
| Isoleucine, %                                   | 1.05        | Phosphorus, %                 | 0.76       |
| Leucine, %                                      | 1.63        | Phosphorus (available), %     | 0.44       |
| Lysine, %                                       | 1.30        | Potassium, %                  | 0.93       |
| Methionine, %                                   | 0.69        | Magnesium, %                  | 0.24       |
| Cystine, %                                      | 0.29        | Sulfur, %                     | 0.33       |
| Phenylalanine, %                                | 0.98        | Sodium, %                     | 0.21       |
| Tyrosine, %                                     | 0.62        | Chloride, %                   | 0.37       |
| Threonine, %                                    | 0.80        | Fluorine, ppm                 | 18.3       |
| Tryptophan, %                                   | 0.30        | Iron, ppm                     | 375        |
| Valine, %                                       | 1.07        | Zinc, ppm                     | 116        |
| Alanine, %                                      | 1.16        | Manganese, ppm                | 99         |
| Aspartic Acid, %                                | 2.32        | Copper, ppm                   | 14         |
| Glutamic Acid, %                                | 5.27        | Cobalt, ppm                   | 0.40       |
| Glycine, %                                      | 1.09        | Iodine, ppm                   | 0.98       |
| Proline, %                                      | 1.71        | Chromium, ppm                 | 0.91       |
| Serine, %                                       | 1.19        | Selenium, ppm                 | 0.38       |
| Taurine, %                                      | 0.04        |                               |            |
| <b>Fat (ether extract), %</b>                   | <b>5.5</b>  | <b>Vitamins</b>               |            |
| <b>Fat (acid hydrolysis), %</b>                 | <b>6.4</b>  | Carotene, ppm                 | 1.2        |
| Cholesterol, ppm                                | 227         | Vitamin A, IU/g               | 18         |
| Linoleic Acid, %                                | 1.81        | Vitamin D-3 (added), IU/g     | 2.4        |
| Linolenic Acid, %                               | 0.18        | Vitamin E, IU/kg              | 75         |
| Arachidonic Acid, %                             | 0.01        | Vitamin K (as menadione), ppm | 1.9        |
| Omega-3 Fatty Acids, %                          | 0.28        | Thiamin Hydrochloride, ppm    | 10         |
| Total Saturated Fatty Acids, %                  | 1.60        | Riboflavin, ppm               | 14.3       |
| Total Monounsaturated Fatty Acids, %            | 1.61        | Niacin, ppm                   | 60         |
| Polyunsaturated Fatty Acids, %                  | 1.85        | Pantothenic Acid, ppm         | 13         |
|                                                 |             | Folic Acid, ppm               | 1.2        |
|                                                 |             | Pyridoxine, ppm               | 8.17       |
| <b>Fiber (max), %</b>                           | <b>4.2</b>  | Biotin, ppm                   | 0.4        |
| Neutral Detergent Fiber <sup>2</sup> , %        | 15.1        | Vitamin B-12, mcg/kg          | 77         |
| Acid Detergent Fiber <sup>3</sup> , %           | 5.1         | Choline Chloride, ppm         | 1,999      |
|                                                 |             | Ascorbic Acid, ppm            | 0.0        |
| <b>Nitrogen-Free Extract (by difference), %</b> | <b>51.6</b> |                               |            |
| Starch, %                                       | 32.53       |                               |            |
| Glucose, %                                      | 0.12        |                               |            |
| Fructose, %                                     | 0.16        |                               |            |
| Sucrose, %                                      | 0.97        |                               |            |
| Lactose, %                                      | 0.00        |                               |            |
| <b>Total Digestible Nutrients, %</b>            | <b>78.1</b> |                               |            |
| <b>Energy (kcal/g)<sup>4</sup></b>              | <b>3.46</b> |                               |            |
| <b>From:</b>                                    | <b>kcal</b> | <b>%</b>                      |            |
| Protein                                         | 0.899       | 26.0                          |            |
| Fat (ether extract)                             | 0.494       | 14.3                          |            |
| Carbohydrates                                   | 2.062       | 59.7                          |            |

1. Formulation based on calculated values from the latest ingredient analysis information. Since nutrient composition of natural ingredients varies and some nutrient loss will occur due to manufacturing processes, analysis will differ accordingly. Nutrients expressed as percent of ration on an As-Fed basis except where otherwise indicated. Moisture content is assumed to be 10.0% for the purpose of calculations.
2. NDF = approximately cellulose, hemicellulose and lignin.
3. ADF = approximately cellulose and lignin.
4. Energy (kcal/gm) - Sum of decimal fractions of protein, fat and carbohydrate x 4,9,4 kcal/gm respectively.

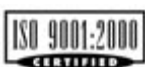

Supplement: jcbfm201387x3.pdf [file jcbfm201387x3.pdf]
