# Supplementary material
Source: PubMed Central journal article supplement (PMC3734783)
Supplement: jcbfm201387x2.pdf [file jcbfm201387x2.pdf]

## Supplementary Material 1

| MacroNutrients              | STD diet<br>(Labdiet 5ANE<br>RMH3000) | KG diet<br>(Research Diets D12369B) |
|-----------------------------|---------------------------------------|-------------------------------------|
| Starch % by weight          | 32.53                                 | 0.00                                |
| D glucose % by weight       | 0.12                                  | 0.00                                |
| Fructose % by weight        | 0.16                                  | 0.00                                |
| Sucrose % by weight         | 0.97                                  | <1%                                 |
| Lactose % by weight         | 0.00                                  | 0.00                                |
| Saturated % by weight       | 1.60                                  | 19.45                               |
| Monounsaturated % by weight | 1.61                                  | 33.04                               |
| Polyunsaturated % by weight | 1.85                                  | 14.56                               |
| Protein % by weight         | 22.5                                  | 17.3                                |
| Fat % by weight             | 5.5                                   | 67.0                                |
| Carbohydrates % by weight   | 51.6                                  | <1%                                 |
| Fiber % by weight           | 4.2                                   | 8.7                                 |
| Protein % by energy         | 26.0                                  | 10.4                                |
| Fat % by energy             | 14.3                                  | 89.1                                |
| carbohydrates % by energy   | 59.7                                  | 0.5                                 |

Macronutrients of the standard (STD) diet and ketogenic (KG) diet

| Micronutrients by weight     | STD diet<br>(Labdiet 5ANE<br>RMH3000) | KG diet<br>(Research Diets D12369B) |
|------------------------------|---------------------------------------|-------------------------------------|
| <b>Minerals</b>              |                                       |                                     |
| Ca %                         | 1.06                                  | 0.90                                |
| P %                          | 0.76                                  | 0.69                                |
| Mg %                         | 0.24                                  | 0.09                                |
| K %                          | 0.93                                  | 0.62                                |
| S %                          | 0.33                                  | 0.06                                |
| Na %                         | 0.21                                  | 0.17                                |
| Cl %                         | 0.37                                  | 0.28                                |
| Cr ppm (STD) or %(KG) *      | 0.91                                  | 0.00035                             |
| Cu ppm (STD) or %(KG) *      | 14                                    | 0.00104                             |
| I ppm (STD) or % (KG) *      | 0.98                                  | 0.00003                             |
| Fe ppm (STD) or % (KG) *     | 375                                   | 0.00779                             |
| Mn ppm (STD) or % (KG) *     | 99                                    | 0.01022                             |
| Se ppm (STD) or % (KG) *     | 0.38                                  | 0.00003                             |
| Zn ppm (STD) or % (KG) *     | 116                                   | 0.00502                             |
| F ppm                        | 18.3                                  | 0                                   |
| Co ppm                       | 0.4                                   | 0                                   |
| <b>Vitamins</b>              |                                       |                                     |
| Carotene ppm                 | 1.2                                   | 0                                   |
| Vitamin A IU/g               | 18                                    | 4000 **                             |
| Vitamin D3 IU/g              | 2.4                                   | 1000 **                             |
| Vitamin E IU/g               | 75                                    | 50 **                               |
| Vitamine K ppm               | 1.9                                   | 312.5 **                            |
| Thiamin Hydrochloride<br>ppm | 10                                    | 6000 **                             |
| Riboflavin ppm               | 14.3                                  | 6000 **                             |
| Niacin ppm                   | 60                                    | 30000 **                            |
| Pantothenic Acid ppm         | 13                                    | 16000 (calcium salt) **             |
| Folic acid ppm               | 1.2                                   | 2000 **                             |
| Pyridoxine ppm               | 8.17                                  | 7000 **                             |
| Biotin ppm                   | 0.4                                   | 2.0 **                              |
| Vitamin B12 mcg/kg           | 77                                    | 10 **                               |
| Choline Chloride ppm         | 1999                                  | 0                                   |
| Ascorbic Acid ppm            | 0                                     | 0                                   |

\* The STD diet nutrients are expressed in units of ppm, KG diet nutrients are expressed in % weight.

\*\* The KG diet nutrients (Vitamins) are shown as their respective units in 1gram vitamin mix, which further mixes with the diet that contains 3917kcal. Refer to supplementary material 3, D12369B.

## Micronutrients from the STD diet and KG diet

The STD diet datasheet was obtained from Cincinnati lab ([cincinnatiab.com](http://cincinnatiab.com))

The KG diet datasheet was obtained from Research Diets ([ResearchDiets.com](http://ResearchDiets.com))
